# Supplementary material for: Coupling Ultrafiltration-Based Processes to Concentrate Phenolic Compounds from Aqueous Goji Berry Extracts
Source: MDPI journal article supplement (doi:10.3390/molecules25163761), 2020-08-18
Supplement: s1 [file s1]

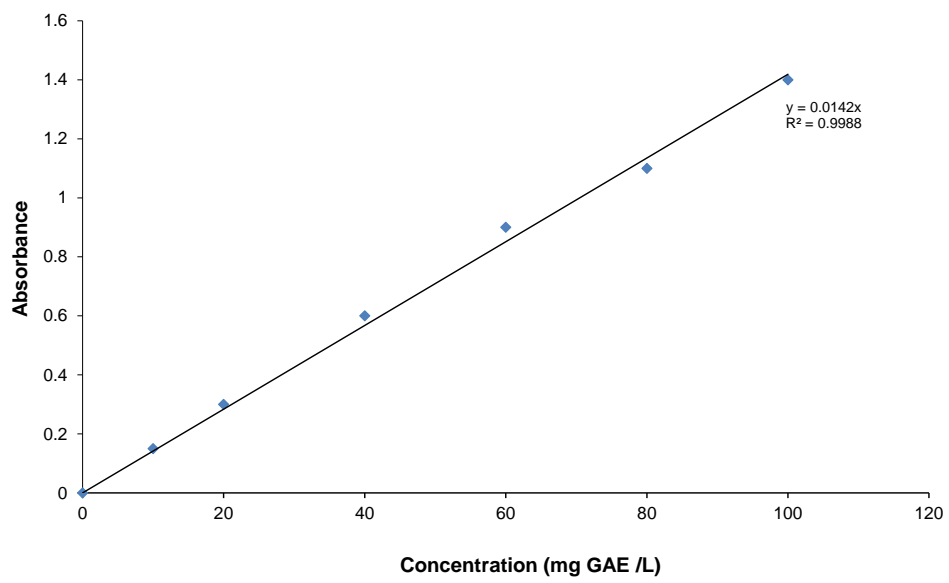

**Figure S1.** Gallic acid standard curve for total phenolic content.

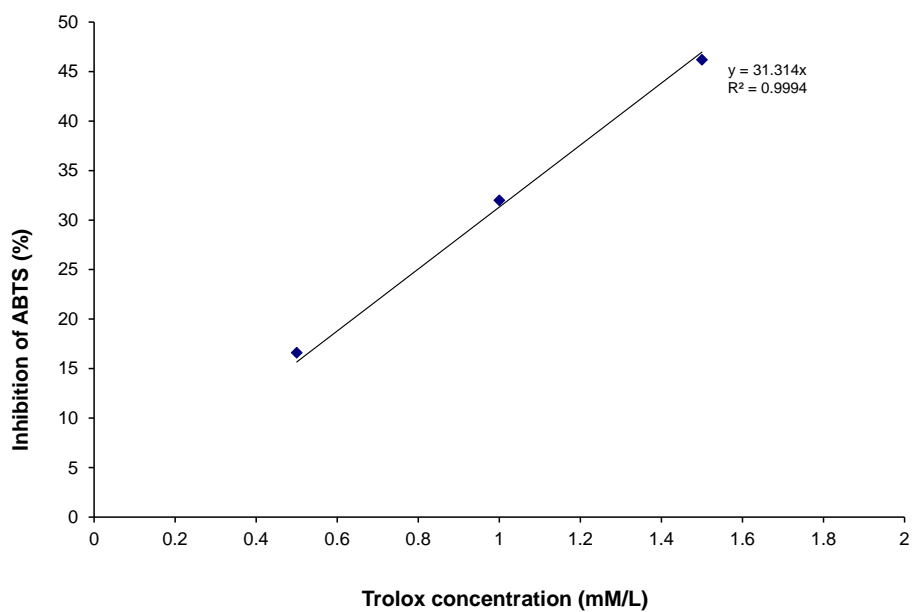

**Figure S2.** Calibration curve of ABTS inhibition by Trolox standards.

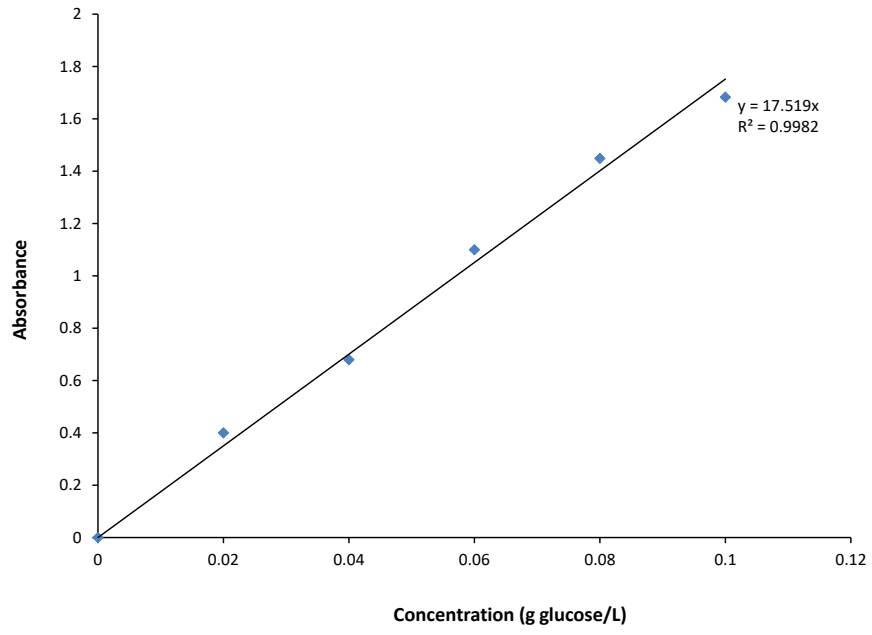

**Figure S3.** Standard curve of total carbohydrate content.
